# Supplementary material
Source: publisher figshare collection journal article supplement (https://tandf.figshare.com/ndownloader/files/7301936)
Supplement: Supplementary file 1 [file 7301936]

## Sheet: DifferenceData
DomainName	Quantity	Exchange	Shift	Allocation
Corn	2.13729	9.44372	2.37419	11.8179
Cotton	0.383563	0.867238	0.0764496	0.943687
Sorghum	0.269274	0.88148	0.0151323	0.896613
Soybeans	3.45014	7.73163	0.281737	8.01336
Spring Wheat	0.28106	1.56163	0.0448376	1.60647
Winter Wheat	0.585323	3.34908	0.286414	3.6355
Alfalfa	1.33686	0.914516	0.0486827	0.963199
Other Hay/Non-Alfalfa	2.95999	0.597367	-4.44089e-16	0.597367
Fallow/Idle Cropland	1.14747	2.0133	0.0341414	2.04744
Other	12.551	10.7591	3.55271e-15	10.7591
